# Supplementary material
Source: Springer Nature journal article supplement (https://www.springermedizin.de/resource/supplementary/12955_2005_196_MOESM6_ESM.pdf/9559876)

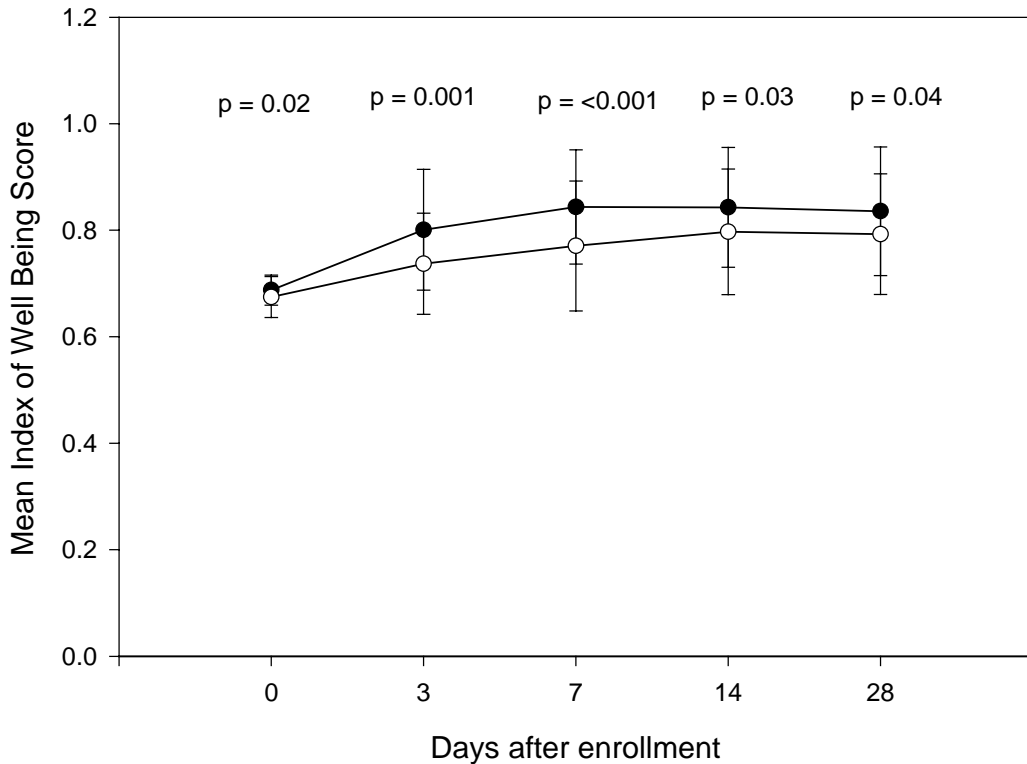

—●— no adverse event  
—○— yes adverse event

Supplement: MOESM6 [file 9559876]
